# Supplementary material for: Mapping and Function Characterization of the Tomato Spotted wilt Virus Resistance Gene SlCHS3 in Solanum Lycopersicum
Source: Research Square preprint supplement (doi:10.21203/rs.3.rs-1222938/v1), 2022-01-31
Supplement: Supplementary file 1 [file a555cb04077d2766ed91c7d7.docx]

**Table S1.** Primers used in the gene mapping, gene cloning, and RT-qPCR

| Primer names | Forward (5'–3') | Reverse (5'–3') |
| --- | --- | --- |
| pInDel2 | GTGCTCGTACAATGTGCTTAGA | GGTTGATGCTTGAAGACTTGGA |
| pInDel3 | CCTCTAAGAACTTCCACCTC | CTTGGTCTGGTCCGTGTA |
| p500-V | GAATTCCCCTTCTCAGCTTCTTCCTTC (*EcoR*I site underlined) | GGATCCAGTTTTGTTATCCTCCGCCCT (*BamH*I site underlined) |
| pSlCHS3-V | GAATTCGCCCAAACTCTTGTCCCCGA (*EcoR*I site underlined) | GGATCCCAATGTAAGCCCAGCCCACT (*BamH*I site underlined) |
| p520-V | GAATTCAACCAACAAAAAGTGAAAAAAA (*EcoR*I site underlined) | GGATCCAGAAATAACAACAAGCCCATAA (*BamH*I site underlined) |
| pSlCHS3-O | TCTAGATGACATTAGTTGTTGAAGCACG (*Xba*I site underlined) | GGTACCAGCCAGATGAAATTATTTTACGA (*Kpn*I site underlined) |
| pN-Q | GCCTATGGATTACCTCTTGATGA | TCTGTGAGTTTTGCCTGTTTTTT |
| pRPL2-Q | CAGCGGATGTCGTGCTATGAT | GGGATGCTCCACTGGATTCA |
| p500-Q | CCCTTCTCAGCTTCTTCCTTC | AGTTTTGTTATCCTCCGCCCT |
| pSlCHS3-Q | CAAAAGGCCATCAAAGAATG | ACTGGGTCCACGGAACGTAA |
| p520-Q | TTTTTCTTATGGGCTTGTTGTT | CTCTTCAGATTCCGCTTCTTCT |
